# Supplementary material for: Highly diastereoselective addition of nitromethane anion to chiral α-amidoalkylphenyl sulfones. Synthesis of optically active α-amino acid derivatives
Source: Royal Society of Chemistry journal article supplement (doi:10.1039/b309211a), 2003-01-01
Supplement: b309211a.pdf [file b309211a.pdf]

**Highly diastereoselective addition of nitromethane anion to chiral  $\alpha$ -amidoalkylphenyl sulfones.**

**Synthesis of optically active  $\alpha$ -amino acid derivatives.**

Elisabetta Foresti,<sup>†</sup> Gianni Palmieri, Marino Petrini\* and Roberto Profeta

Dipartimento di Scienze Chimiche, Università di Camerino, via S. Agostino, 1. I-62032 Camerino, Italy

and Dipartimento di Chimica “G.Ciamician”, via Selmi, 2. I-40126 Bologna, Italy.

phone: +39 0737 402270-402253; fax: +39 0737 402297; e-mail: marino.petrini@unicam.it

**Supporting Information**

**Figure 6.** PM3 minimized structures of the transition states leading to sulfones **21**.

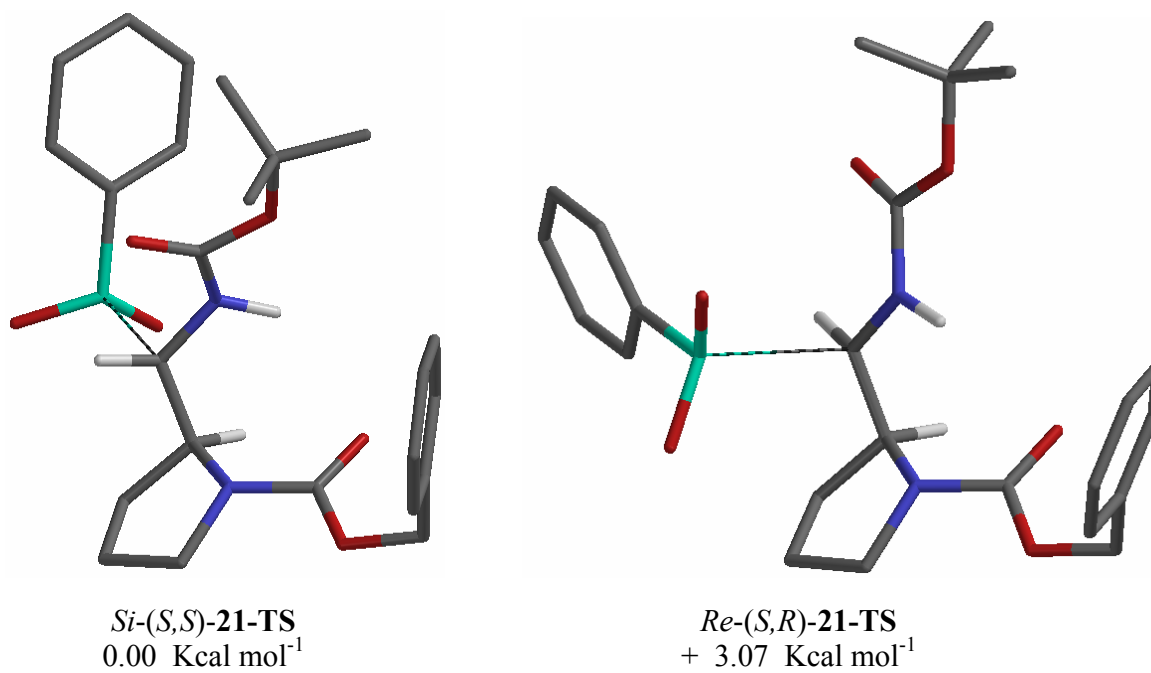

**Figure 7.** PM3 minimized structures of the transition states leading to nitro derivatives **22**.

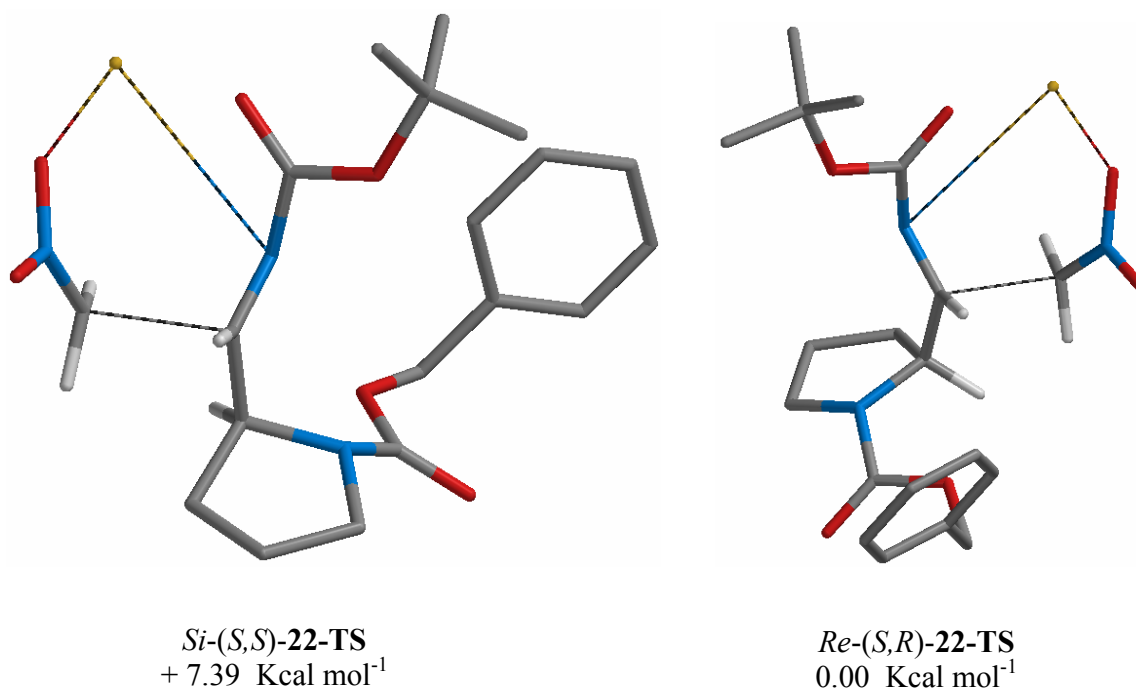

## COMPUTATIONAL CALCULATIONS

(S) -7

SPARTAN 'O2 Fast HF Program: (PC/x86c)  
 Run type: Geometry optimization  
 (Analytical Gradient)  
 Model: RHF/AM1  
 Number of shells: 52  
 36 S shells  
 16 P shells  
 Number of basis functions: 84  
 Number of electrons: 92  
 Use of molecular symmetry disabled  
 Molecular charge: 1  
 Spin multiplicity: 1  
 Point Group = C1 Order = 1 Nsymop = 1  
 This system has 102 degrees of freedom  
 Initial Hessian option  
 Hessian from MMFF94 calculation used.

Heat of Formation: -7.985 kcal/mol

36 84 52 156 1 1 84 0 RHF AM1 OPT

C1

GEOMETRY

|   |            |            |            |
|---|------------|------------|------------|
| 1 | 2.0393748  | 2.0323872  | 6.3488068  |
| 6 | 3.8074354  | 1.1781664  | 5.5708199  |
| 1 | 5.5163451  | 1.9425696  | 6.5585923  |
| 6 | 4.1116462  | 1.4020054  | 2.6746675  |
| 1 | 5.7152070  | 2.6823996  | 2.0937608  |
| 6 | 1.7406687  | 2.3851397  | 1.4487895  |
| 8 | 3.6153892  | -1.4751164 | 5.9700276  |
| 8 | 4.6635754  | -1.0874275 | 1.8381352  |
| 6 | 4.9112473  | -2.7903270 | 3.9895510  |
| 6 | 7.6865766  | -3.1850399 | 4.5883361  |
| 1 | 8.6089397  | -1.3514009 | 5.0704596  |
| 1 | 8.6592797  | -4.0276475 | 2.9172853  |
| 1 | 7.8599204  | -4.4942667 | 6.2345094  |
| 6 | 3.5121961  | -5.2241928 | 3.4118983  |
| 1 | 1.5158198  | -4.8234066 | 2.8699961  |
| 1 | 3.5220131  | -6.4444197 | 5.1346821  |
| 1 | 4.4824380  | -6.2276846 | 1.8309395  |
| 1 | 1.1224498  | 4.3340493  | 2.0000933  |
| 7 | 0.4063382  | 1.1413376  | -0.2174401 |
| 6 | -1.8658233 | 2.2012339  | -1.3906213 |
| 8 | -2.6225407 | 4.3269361  | -0.8540183 |
| 8 | -2.8510686 | 0.5326173  | -3.0094631 |
| 6 | -5.1834375 | 1.2221497  | -4.4437528 |
| 6 | -7.3210583 | 1.6729687  | -2.5986765 |
| 1 | -6.9794005 | 3.4174648  | -1.4589484 |

|   |            |            |            |
|---|------------|------------|------------|
| 1 | -7.5390010 | 0.0261325  | -1.2978006 |
| 1 | -9.1186508 | 1.9207779  | -3.6804821 |
| 6 | -5.5940339 | -1.1567676 | -6.0055139 |
| 1 | -7.3273088 | -0.8885036 | -7.1810451 |
| 1 | -5.8608179 | -2.8316438 | -4.7516605 |
| 1 | -3.9450566 | -1.5065630 | -7.2733002 |
| 6 | -4.6385733 | 3.4989296  | -6.0857074 |
| 1 | -4.3365024 | 5.2247813  | -4.9071358 |
| 1 | -6.2910742 | 3.8372692  | -7.3578704 |
| 1 | -2.9292624 | 3.1636762  | -7.2766023 |
| 1 | 0.9067496  | -0.6285846 | -0.7613116 |

*Si*-(*R,S*)-5a-TS

SPARTAN '02 Fast HF Program: (PC/x86c)  
 Run type: Geometry optimization  
 (Analytical Gradient)  
 (MM/Amide correction used)  
 Model: RHF/PM3  
 Number of shells: 75  
 50 S shells  
 25 P shells  
 Number of basis functions: 125  
 Number of electrons: 140  
 Use of molecular symmetry disabled  
 Molecular charge: 0  
 Spin multiplicity: 1  
 Point Group = C1 Order = 1 Nsymop = 1  
 This system has 144 degrees of freedom  
 Found 1 amide linkage(s)

Heat of Formation: -167.591 kcal/mol

50 125 75 225 0 1 125 0 RHF PM3 XOPT

C1

GEOMETRY

|   |            |            |            |
|---|------------|------------|------------|
| 1 | -2.0551405 | 2.1865630  | 6.2882655  |
| 6 | -1.2109531 | 4.0391599  | 5.6878055  |
| 1 | -2.6472986 | 5.5286358  | 5.8913380  |
| 6 | 0.0621681  | 3.9759595  | 3.0784277  |
| 1 | -0.2747052 | 5.7645870  | 2.0041169  |
| 8 | 0.7571849  | 4.7243032  | 7.3774432  |
| 8 | 2.7056721  | 3.9871875  | 3.5960216  |
| 6 | 3.1489871  | 4.1172933  | 6.2765323  |
| 6 | 5.0014633  | 6.2783902  | 6.8128744  |
| 1 | 4.3088708  | 8.0981071  | 6.0989727  |
| 1 | 6.8374179  | 5.9076424  | 5.9227259  |
| 1 | 5.3129071  | 6.4799542  | 8.8534163  |
| 6 | 4.1782157  | 1.5941315  | 7.2589969  |
| 1 | 2.8595530  | 0.0243595  | 6.9328402  |
| 1 | 4.5279274  | 1.6994080  | 9.3004293  |
| 1 | 5.9694768  | 1.1152631  | 6.3305829  |
| 6 | 0.2428091  | 0.5851154  | -3.0102449 |
| 8 | -1.9324554 | 0.5649155  | -3.7757747 |
| 8 | 2.3558963  | 0.2089359  | -4.4091047 |
| 6 | 2.2355109  | -0.4496557 | -7.0695839 |
| 6 | 0.8562190  | -2.9523048 | -7.4963177 |
| 1 | -1.1824476 | -2.7954414 | -7.1417475 |
| 1 | 1.5987760  | -4.4542052 | -6.2724873 |
| 1 | 1.0950502  | -3.5718087 | -9.4621146 |
| 6 | 5.0377149  | -0.7433791 | -7.7658006 |
| 1 | 5.2296716  | -1.2486010 | -9.7688193 |
| 1 | 5.9579175  | -2.2340615 | -6.6531639 |
| 1 | 6.0979756  | 1.0141041  | -7.4596566 |

|    |             |            |             |
|----|-------------|------------|-------------|
| 6  | 1.0551209   | 1.6672599  | -8.6426827  |
| 1  | -0.9832065  | 1.8559927  | -8.3022355  |
| 1  | 1.3101442   | 1.2799334  | -10.6651223 |
| 1  | 1.9367890   | 3.5019844  | -8.2416788  |
| 6  | -0.7385415  | 1.8261239  | 1.3772037   |
| 7  | 0.9902742   | 0.9189652  | -0.4340967  |
| 1  | 2.8165422   | 1.2620463  | -0.1042592  |
| 16 | -1.7677102  | -2.3086069 | 4.0393302   |
| 8  | -2.9892285  | -1.1821201 | 6.3222868   |
| 8  | 0.5193820   | -3.8723917 | 4.4185009   |
| 1  | -2.7282079  | 1.9501334  | 0.7635283   |
| 6  | -3.9910906  | -3.7987055 | 2.0642836   |
| 6  | -7.5121103  | -6.0608455 | -1.1685431  |
| 6  | -3.2847673  | -5.8098156 | 0.5041728   |
| 6  | -6.4894216  | -2.9433295 | 1.9867595   |
| 6  | -8.2381730  | -4.0659151 | 0.3819126   |
| 6  | -5.0331875  | -6.9331872 | -1.1008611  |
| 1  | -1.3343109  | -6.5196281 | 0.5614737   |
| 1  | -7.0792161  | -1.3831987 | 3.2225739   |
| 1  | -10.1893491 | -3.3767644 | 0.3403234   |
| 1  | -4.4553245  | -8.5092504 | -2.3114883  |
| 1  | -8.8887958  | -6.9432390 | -2.4373551  |

**Re- (R,R) -5a-TS**

SPARTAN 'O2 Fast HF Program: (PC/x86c)

Run type: Geometry optimization  
(Analytical Gradient)  
(MM/Amide correction used)

Model: RHF/PM3

Number of shells: 75

50 S shells

25 P shells

Number of basis functions: 125

Number of electrons: 140

Use of molecular symmetry disabled

Molecular charge: 0

Spin multiplicity: 1

Point Group = C1 Order = 1 Nsymop = 1

This system has 144 degrees of freedom

Found 1 amide linkage(s)

Heat of Formation: -170.491 kcal/mol

50 125 75 225 0 1 125 0 RHF PM3 XOPT

C1

GEOMETRY

|   |            |            |            |
|---|------------|------------|------------|
| 1 | 2.0552989  | 0.2514191  | 5.8981529  |
| 6 | 3.9987855  | 0.5451109  | 5.2133312  |
| 1 | 5.0031980  | 1.7595334  | 6.5801935  |
| 6 | 4.2100689  | 1.5152247  | 2.4748213  |
| 1 | 5.1612014  | 3.3940724  | 2.3623214  |
| 8 | 5.1371916  | -1.8768511 | 5.1870019  |
| 8 | 5.8599670  | -0.2375072 | 1.2542102  |
| 6 | 6.7541299  | -2.0887437 | 3.0254385  |
| 6 | 9.5172603  | -1.5524551 | 3.7203580  |
| 1 | 9.7568639  | 0.3362511  | 4.5435843  |
| 1 | 10.7310676 | -1.6647674 | 2.0436503  |
| 1 | 10.2077198 | -2.9355865 | 5.1026643  |
| 6 | 6.4553297  | -4.7312901 | 1.8828865  |
| 1 | 4.4941146  | -5.1307981 | 1.3361323  |
| 1 | 7.0388153  | -6.1868471 | 3.2397020  |
| 1 | 7.6345383  | -4.9315279 | 0.1876331  |
| 6 | -1.8906317 | -1.1199674 | 0.2218578  |
| 8 | -3.5469370 | 0.2217468  | 1.1037780  |
| 8 | -2.1950937 | -3.5015214 | -0.6814515 |
| 6 | -4.6651589 | -4.6746535 | -0.8731307 |
| 6 | -5.8831744 | -5.0438768 | 1.7209089  |
| 1 | -6.5018144 | -3.2495501 | 2.5596896  |
| 1 | -4.5798801 | -5.9505562 | 3.0560394  |
| 1 | -7.5571136 | -6.2595939 | 1.5574791  |
| 6 | -4.0417141 | -7.2597797 | -2.0367241 |
| 1 | -5.7781448 | -8.3627989 | -2.3080535 |
| 1 | -2.7795657 | -8.3686997 | -0.8192011 |

|    |            |            |            |
|----|------------|------------|------------|
| 1  | -3.1233510 | -7.0727065 | -3.8885086 |
| 6  | -6.4173640 | -3.2078551 | -2.6418990 |
| 1  | -7.0036534 | -1.3880271 | -1.8345901 |
| 1  | -8.1403105 | -4.3036025 | -3.0106907 |
| 1  | -5.5124352 | -2.8278582 | -4.4707266 |
| 6  | 1.6864842  | 1.7040908  | 1.1678817  |
| 1  | 0.2965652  | 2.8735769  | 2.1924775  |
| 7  | 0.6855505  | -0.3959795 | -0.1498313 |
| 16 | 2.5058682  | 5.1603217  | -2.3888727 |
| 6  | -0.6243750 | 6.1580457  | -2.8911596 |
| 6  | -5.6535101 | 7.6398208  | -3.5982310 |
| 6  | -1.8024055 | 7.7860838  | -1.1753071 |
| 6  | -2.0037241 | 5.2891870  | -4.9706808 |
| 6  | -4.4991320 | 6.0261855  | -5.3226468 |
| 6  | -4.2985405 | 8.5220828  | -1.5255534 |
| 1  | -0.7372592 | 8.5032532  | 0.4562113  |
| 1  | -1.1003321 | 4.0233007  | -6.3475505 |
| 1  | -5.5551104 | 5.3333717  | -6.9621870 |
| 1  | -5.1978467 | 9.7961063  | -0.1648484 |
| 1  | -7.6232807 | 8.2141852  | -3.8708028 |
| 8  | 3.6239401  | 4.0191641  | -4.6582646 |
| 8  | 3.9915303  | 7.0398561  | -0.9728386 |
| 1  | 1.9063481  | -1.7885907 | -0.5246545 |



## (S) -8

SPARTAN 'O2 Fast HF Program: (PC/x86c)  
 Run type: Geometry optimization  
 (Analytical Gradient)  
 Model: RHF/AM1  
 Number of shells: 51  
 35 S shells  
 16 P shells  
 Number of basis functions: 83  
 Number of electrons: 92  
 Use of molecular symmetry disabled  
 Molecular charge: 0  
 Spin multiplicity: 1  
 Point Group = C1 Order = 1 Nsymop = 1  
 This system has 99 degrees of freedom  
 Initial Hessian option  
 Hessian from MMFF94 calculation used.

Heat of Formation: -160.291 kcal/mol

35 83 51 153 0 1 83 0 RHF AM1 OPT

C1

GEOMETRY

|   |            |            |            |
|---|------------|------------|------------|
| 1 | -2.4136411 | 4.4896093  | -0.5958008 |
| 6 | -4.1403242 | 3.8546997  | -1.6358770 |
| 1 | -5.8287128 | 4.9663347  | -1.0184696 |
| 6 | -4.5766867 | 0.9933575  | -1.4738411 |
| 1 | -6.5238568 | 0.4906176  | -0.7883705 |
| 6 | -2.5997771 | -0.3711151 | 0.0752680  |
| 8 | -3.7947055 | 4.3673152  | -4.2644773 |
| 8 | -4.4336285 | 0.1184165  | -4.0263635 |
| 6 | -3.4270849 | 2.0620844  | -5.6348198 |
| 6 | -4.9721116 | 2.1496221  | -8.0550429 |
| 1 | -6.9985540 | 2.5147635  | -7.6084465 |
| 1 | -4.8038049 | 0.3025351  | -9.0544559 |
| 1 | -4.2423705 | 3.6981347  | -9.2842544 |
| 6 | -0.6300429 | 1.6116698  | -6.1281180 |
| 1 | 0.4064750  | 1.4165041  | -4.3025033 |
| 1 | 0.1625789  | 3.2449954  | -7.1984895 |
| 1 | -0.3869409 | -0.1546738 | -7.2503357 |
| 1 | -1.4457198 | -1.7294678 | -1.0428424 |
| 7 | -2.3782116 | 0.0276291  | 2.4595340  |
| 6 | -0.5498884 | -1.2634250 | 3.9422276  |
| 8 | -0.9552464 | -2.3328988 | 5.9750707  |
| 8 | 1.8549064  | -1.1105187 | 2.9827670  |
| 6 | 3.9913804  | -1.9785662 | 4.4674332  |
| 6 | 4.1535791  | -0.5495929 | 6.9523508  |
| 1 | 2.5656901  | -1.1007166 | 8.2293949  |
| 1 | 4.0554552  | 1.5277603  | 6.6013998  |
| 1 | 5.9820143  | -1.0011279 | 7.9002665  |

|   |           |            |           |
|---|-----------|------------|-----------|
| 6 | 6.2482112 | -1.3301413 | 2.7872217 |
| 1 | 8.0202498 | -1.9323930 | 3.7557191 |
| 1 | 6.3169670 | 0.7466306  | 2.4324038 |
| 1 | 6.0900655 | -2.3282508 | 0.9373597 |
| 6 | 3.8372950 | -4.8150132 | 4.8864452 |
| 1 | 5.6387288 | -5.4936409 | 5.7461861 |
| 1 | 3.5383699 | -5.8052187 | 3.0488917 |
| 1 | 2.2393430 | -5.2859189 | 6.1825687 |

**Re- (S,R) -6a-TS**

SPARTAN 'O2 Fast HF Program: (PC/x86c)  
 Run type: Single point energy  
 Model: RHF/3-21G(\*)  
 Number of shells: 105  
   63 S shells  
   42 SP shells  
 Number of basis functions: 231  
 Number of electrons: 158  
 Number of heavy atoms: 21  
 Number of hydrogens: 21  
 Use of molecular symmetry disabled  
 Molecular charge: 0  
 Spin multiplicity: 1  
 Memory model: direct 17.4 Mb  
 Point Group = C1 Order = 1 Nsymop = 1  
 This system has 120 degrees of freedom

E(HF) = -1026.2993355 a.u.

42 231 105 189 0 1 231 0 RHF 3-21G(\*) NOOPT  
 C1

GEOMETRY

|   |            |            |            |
|---|------------|------------|------------|
| 1 | 1.3247087  | 1.1409951  | 6.4067479  |
| 6 | -0.6377376 | 0.4150928  | 6.5051393  |
| 1 | -0.8105122 | -0.7475617 | 8.2259521  |
| 6 | -1.5132399 | -0.9551639 | 4.1026645  |
| 1 | -2.0397397 | -2.9621184 | 4.4518908  |
| 6 | 0.3212382  | -0.6972714 | 1.8920147  |
| 8 | -2.2823900 | 2.5100911  | 6.8086576  |
| 8 | -3.8285741 | 0.2630753  | 3.4398278  |
| 6 | -4.0684040 | 2.6078890  | 4.7761178  |
| 6 | -6.7511403 | 2.7978400  | 5.8489287  |
| 1 | -7.1992588 | 1.2103699  | 7.1059598  |
| 1 | -8.1544046 | 2.8094233  | 4.3221186  |
| 1 | -6.9784428 | 4.5477647  | 6.9380093  |
| 6 | -3.4808047 | 4.8558322  | 3.0368080  |
| 1 | -1.5820844 | 4.7221966  | 2.2098455  |
| 1 | -3.5848215 | 6.6418374  | 4.0852095  |
| 1 | -4.8421809 | 4.9531100  | 1.4757105  |
| 1 | 1.3891274  | 1.0865536  | 1.7263227  |
| 7 | 0.1209818  | -2.3611156 | 0.0925058  |
| 6 | 1.4002745  | -2.3213718 | -2.2637365 |
| 8 | 2.9738791  | -3.9232646 | -2.9302237 |
| 8 | 0.5122117  | -0.4891308 | -3.7811070 |
| 6 | 1.1831115  | -0.2529028 | -6.4367686 |
| 6 | 3.9991666  | 0.2930478  | -6.7860729 |
| 1 | 5.1858899  | -1.3521502 | -6.3429993 |
| 1 | 4.6289202  | 1.8688880  | -5.5919529 |
| 1 | 4.3832506  | 0.8139975  | -8.7578290 |
| 6 | -0.3700992 | 2.0549585  | -7.2632395 |

|   |            |            |            |
|---|------------|------------|------------|
| 1 | -0.0455398 | 2.4557331  | -9.2728045 |
| 1 | 0.1465878  | 3.7570215  | -6.1942880 |
| 1 | -2.4064356 | 1.7467006  | -7.0068307 |
| 6 | 0.3700761  | -2.5697955 | -7.9588007 |
| 1 | 0.5766489  | -2.1961596 | -9.9895049 |
| 1 | -1.6177792 | -3.0542106 | -7.6122562 |
| 1 | 1.5156401  | -4.2446449 | -7.5212631 |
| 6 | 4.2901492  | -1.8463770 | 3.7104327  |
| 1 | 3.8639838  | -0.6358079 | 5.3244540  |
| 7 | 4.4839094  | -4.3888209 | 4.0279004  |
| 8 | 5.3489067  | -5.7887835 | 2.2115317  |
| 8 | 3.8502528  | -5.5609992 | 5.9286524  |
| 3 | 5.0468390  | -6.2963260 | -1.1117933 |
| 1 | 5.2778353  | -0.9084413 | 2.1680687  |

*Si* - (S,S) - 6a-TS

SPARTAN 'O2 Fast HF Program: (PC/x86c)  
 Run type: Single point energy  
 Model: RHF/3-21G(\*)  
 Number of shells: 105  
   63 S shells  
   42 SP shells  
 Number of basis functions: 231  
 Number of electrons: 158  
 Number of heavy atoms: 21  
 Number of hydrogens: 21  
 Use of molecular symmetry disabled  
 Molecular charge: 0  
 Spin multiplicity: 1  
 Memory model: direct 17.4 Mb  
 Point Group = C1 Order = 1 Nsymop = 1  
 This system has 120 degrees of freedom

E(HF) = -1026.3055773 a.u.

42 231 105 189 0 1 231 0 RHF 3-21G(\*) NOOPT

C1

GEOMETRY

|   |            |            |            |
|---|------------|------------|------------|
| 1 | -2.2418744 | -2.3214258 | 3.7717644  |
| 6 | -3.8447637 | -0.9924507 | 3.8660676  |
| 1 | -5.5916053 | -2.0926769 | 4.1426242  |
| 6 | -4.0004316 | 0.8788104  | 1.6480231  |
| 1 | -5.8389741 | 0.8055088  | 0.6212858  |
| 6 | -1.8286773 | 0.6728214  | -0.2197394 |
| 8 | -3.5330765 | 0.5034078  | 6.0681221  |
| 8 | -3.9764688 | 3.3105189  | 2.8116386  |
| 6 | -3.2007836 | 3.1051914  | 5.3973090  |
| 6 | -4.9395929 | 4.7462687  | 7.0289431  |
| 1 | -6.9308663 | 4.1991864  | 6.8355804  |
| 1 | -4.7798006 | 6.7434046  | 6.4930773  |
| 1 | -4.4305357 | 4.5797903  | 9.0322916  |
| 6 | -0.4249460 | 3.8919850  | 5.7132342  |
| 1 | 0.8364982  | 2.8053674  | 4.4753422  |
| 1 | 0.2036584  | 3.5993656  | 7.6672507  |
| 1 | -0.1748357 | 5.8994829  | 5.2577068  |
| 1 | -0.5866952 | 2.3375893  | -0.4282432 |
| 7 | -1.3142909 | -1.5483062 | -1.1537899 |
| 6 | 0.7689050  | -2.1317280 | -2.7411683 |
| 8 | 0.5925705  | -2.7603812 | -4.9887321 |
| 8 | 2.9409595  | -2.1696507 | -1.4242670 |
| 6 | 5.3298960  | -3.0621180 | -2.4508940 |
| 6 | 5.1964224  | -5.8449937 | -3.2151601 |
| 1 | 4.0300163  | -6.1453541 | -4.9059553 |
| 1 | 4.4185582  | -7.0208087 | -1.6923909 |
| 1 | 7.0975546  | -6.5575204 | -3.6445787 |
| 6 | 7.1276513  | -2.7528519 | -0.1937678 |

|   |            |            |            |
|---|------------|------------|------------|
| 1 | 9.0396621  | -3.3715269 | -0.7095190 |
| 1 | 6.5217089  | -3.8852428 | 1.4365717  |
| 1 | 7.2557407  | -0.7767435 | 0.4271151  |
| 6 | 6.2332900  | -1.4161501 | -4.6475307 |
| 1 | 8.1865140  | -1.9073872 | -5.1479106 |
| 1 | 6.2045672  | 0.6000978  | -4.1576001 |
| 1 | 5.0790914  | -1.6704047 | -6.3548851 |
| 6 | -3.7590753 | 2.7776302  | -3.7158335 |
| 1 | -4.5554272 | 4.1341653  | -2.3912299 |
| 7 | -5.3029891 | 1.2012357  | -5.0257013 |
| 8 | -4.3996929 | -0.1596757 | -6.8590129 |
| 8 | -7.5603498 | 0.8552747  | -4.6000904 |
| 3 | -1.9397229 | -2.3421175 | -7.5673734 |
| 1 | -1.9077888 | 3.2824123  | -4.4585746 |

**(S) -27**

SPARTAN 'O2 Fast HF Program: (PC/x86c)

Run type: Geometry optimization  
(Analytical Gradient)  
(MM/Amide correction used)

Model: RHF/PM3

Number of shells: 72

48 S shells

24 P shells

Number of basis functions: 120

Number of electrons: 130

Use of molecular symmetry disabled

Molecular charge: 0

Spin multiplicity: 1

Point Group = C1 Order = 1 Nsymop = 1

This system has 138 degrees of freedom

Heat of Formation: -142.756 kcal/mol

48 120 72 216 0 1 120 0 RHF PM3 OPT

C1

GEOMETRY

|   |            |            |            |
|---|------------|------------|------------|
| 1 | -5.2149944 | -3.5998797 | -5.9062380 |
| 6 | -4.6732854 | -5.0351090 | -4.4864826 |
| 6 | -2.6238202 | -4.0476827 | -2.6810651 |
| 7 | -3.4743875 | -4.7470885 | -0.0637430 |
| 6 | -5.9358693 | -6.1257366 | -0.1731563 |
| 6 | -6.9216991 | -5.8174776 | -2.8621291 |
| 1 | -3.9443553 | -6.6568200 | -5.5874948 |
| 1 | -0.7592818 | -4.9343511 | -3.1408272 |
| 1 | -7.2139104 | -5.2826862 | 1.2511623  |
| 1 | -5.7094328 | -8.1415984 | 0.3537731  |
| 1 | -8.4351558 | -4.3761959 | -2.9408065 |
| 1 | -7.7961202 | -7.5814500 | -3.5596977 |
| 6 | -1.7054393 | -5.5074735 | 1.8209062  |
| 8 | -2.2549813 | -6.6810071 | 3.7286291  |
| 8 | 0.6946924  | -4.7002623 | 1.3146874  |
| 6 | 2.5078401  | -4.6842201 | 3.3036370  |
| 1 | 4.2812472  | -4.8119977 | 2.2082543  |
| 1 | 2.3552700  | -6.3742846 | 4.5275597  |
| 6 | 2.3942562  | -2.2754648 | 4.7985473  |
| 6 | 2.2286263  | 2.2045221  | 7.5640401  |
| 6 | 1.6985103  | -2.3165343 | 7.3404120  |
| 6 | 3.0086863  | 0.0158195  | 3.6476074  |
| 6 | 2.9144897  | 2.2484920  | 5.0276610  |
| 6 | 1.6246518  | -0.0790097 | 8.7178278  |
| 1 | 1.1957408  | -4.1107092 | 8.2479448  |
| 1 | 3.5528146  | 0.0640235  | 1.6469927  |
| 1 | 3.3798781  | 4.0434202  | 4.0850576  |
| 1 | 1.0809000  | -0.1172651 | 10.7138427 |

|   |            |            |            |
|---|------------|------------|------------|
| 1 | 2.1612705  | 3.9641932  | 8.6497413  |
| 6 | -2.4627025 | -1.1966941 | -2.8371099 |
| 1 | -3.9498354 | -0.0977328 | -1.8779216 |
| 7 | -0.6229773 | -0.1916988 | -4.0712138 |
| 6 | -0.3006177 | 2.4818940  | -4.3981782 |
| 8 | -1.4366896 | 3.7753577  | -5.9197253 |
| 8 | 1.5610032  | 3.2306129  | -2.8175321 |
| 6 | 2.5313103  | 5.7945035  | -2.8337265 |
| 6 | 4.6109402  | 5.6950832  | -0.8119421 |
| 1 | 6.0898621  | 4.3224168  | -1.2978230 |
| 1 | 3.8582758  | 5.1606721  | 1.0597989  |
| 1 | 5.5154360  | 7.5510127  | -0.6154244 |
| 6 | 3.6912195  | 6.4957117  | -5.3858424 |
| 1 | 5.0347117  | 5.0547551  | -6.0364095 |
| 1 | 4.7213050  | 8.2903251  | -5.2343455 |
| 1 | 2.2521305  | 6.7312288  | -6.8623456 |
| 6 | 0.5088608  | 7.7075602  | -2.0563378 |
| 1 | 1.3670976  | 9.5711195  | -1.7471371 |
| 1 | -0.4320853 | 7.1524492  | -0.2926453 |
| 1 | -0.9533862 | 7.9352571  | -3.5107825 |



**Re- (S,R) -22-TS**

SPARTAN 'O2 Fast HF Program: (PC/x86c)

Run type: Single point energy

Model: RHF/3-21G(\*)

Number of shells: 139

81 S shells

58 SP shells

Number of basis functions: 313

Number of electrons: 212

Number of heavy atoms: 29

Number of hydrogens: 26

Use of molecular symmetry disabled

Molecular charge: 0

Spin multiplicity: 1

Memory model: direct 29.3 Mb

Point Group = C1 Order = 1 Nsymop = 1

This system has 159 degrees of freedom

E(HF) = -1346.9664263 a.u.

55 313 139 252 0 1 313 0 RHF 3-21G(\*) NOOPT

C1

GEOMETRY

|   |            |            |            |
|---|------------|------------|------------|
| 7 | -4.5327131 | -0.6417602 | 1.0555105  |
| 6 | -3.6173511 | -3.0495044 | -0.1537447 |
| 1 | -3.4617682 | -4.6360896 | 1.2520352  |
| 6 | -0.9417649 | -2.5588929 | -1.1216271 |
| 6 | -6.7963505 | 0.3360876  | -0.3233292 |
| 6 | -5.5935948 | -3.7311878 | -2.1572947 |
| 6 | -7.1655609 | -1.3622375 | -2.6226737 |
| 1 | 0.4793275  | -2.1599020 | 0.3595552  |
| 7 | -0.6548923 | -1.7654792 | -3.4667366 |
| 6 | 1.5704295  | -0.7632685 | -4.5211033 |
| 8 | 3.2965522  | -1.9755284 | -5.5617676 |
| 8 | 1.4421682  | 1.7698383  | -4.5358607 |
| 6 | 3.2533771  | 3.3821315  | -5.8226819 |
| 6 | 5.9107105  | 3.1211784  | -4.7137740 |
| 1 | 6.7867298  | 1.2934187  | -5.1703129 |
| 1 | 5.9000016  | 3.3192826  | -2.6480150 |
| 1 | 7.1489136  | 4.6023314  | -5.4749649 |
| 6 | 2.2264845  | 6.0399439  | -5.2666441 |
| 1 | 3.4361873  | 7.4777887  | -6.1457148 |
| 1 | 2.1649509  | 6.4319694  | -3.2295604 |
| 1 | 0.3061843  | 6.2947480  | -6.0114115 |
| 6 | 3.2657077  | 2.9265330  | -8.6768129 |
| 1 | 4.3681590  | 4.4030260  | -9.6309463 |
| 1 | 1.3468610  | 2.9716374  | -9.4655825 |
| 1 | 4.1143390  | 1.1003021  | -9.1817658 |
| 6 | 0.2092019  | -6.4869483 | -1.0225621 |
| 1 | -0.6475764 | -6.9449685 | -2.8456806 |

|   |            |            |            |
|---|------------|------------|------------|
| 7 | 2.7772228  | -6.7637939 | -0.7130602 |
| 8 | 4.2529379  | -6.8575410 | -2.6421046 |
| 8 | 3.8545635  | -6.8612836 | 1.3348441  |
| 3 | 4.9945585  | -5.0846429 | -5.4766987 |
| 1 | -1.0173432 | -6.9086735 | 0.5904081  |
| 1 | -6.5497815 | -0.3925990 | -4.3701470 |
| 1 | -9.1815660 | -1.8226149 | -2.9168577 |
| 1 | -8.4915924 | 0.3682404  | 0.9082421  |
| 1 | -6.4096335 | 2.3215626  | -0.8526238 |
| 1 | -4.7128247 | -4.4428773 | -3.9141698 |
| 1 | -6.7983884 | -5.2973126 | -1.4674390 |
| 6 | -4.4797330 | -0.3379575 | 3.7306700  |
| 8 | -5.7872624 | 1.1466448  | 4.9193621  |
| 8 | -2.6921505 | -1.8274742 | 4.8510106  |
| 6 | -2.0762915 | -1.4166350 | 7.4382463  |
| 1 | -1.3880962 | -3.3148764 | 7.9726705  |
| 1 | -3.7639817 | -0.9690194 | 8.5900582  |
| 6 | -0.0489204 | 0.5450282  | 7.7391975  |
| 6 | 3.7338932  | 4.1501436  | 8.3707414  |
| 6 | -0.6600967 | 2.9675355  | 8.5790502  |
| 6 | 2.4609219  | -0.0657658 | 7.2081811  |
| 6 | 4.3454917  | 1.7373317  | 7.5244106  |
| 6 | 1.2326679  | 4.7634278  | 8.8944966  |
| 1 | -2.6357560 | 3.4554309  | 8.9747731  |
| 1 | 2.9432616  | -1.9678462 | 6.5402211  |
| 1 | 6.3134078  | 1.2521533  | 7.1100286  |
| 1 | 0.7487052  | 6.6635172  | 9.5550172  |
| 1 | 5.2211079  | 5.5654481  | 8.6249375  |

*Si* - (S,S) -22-TS

SPARTAN 'O2 Fast HF Program: (PC/x86c)  
 Run type: Single point energy  
 Model: RHF/3-21G(\*)  
 Number of shells: 139  
   81 S shells  
   58 SP shells  
 Number of basis functions: 313  
 Number of electrons: 212  
 Number of heavy atoms: 29  
 Number of hydrogens: 26  
 Use of molecular symmetry disabled  
 Molecular charge: 0  
 Spin multiplicity: 1  
 Memory model: direct 29.3 Mb  
 Point Group = C1 Order = 1 Nsymop = 1  
 This system has 159 degrees of freedom

E(HF) = -1346.9546481 a.u.

55 313 139 252 0 1 313 0 RHF 3-21G(\*) NOOPT  
 C1  
 GEOMETRY

|   |            |            |            |
|---|------------|------------|------------|
| 7 | -4.7096497 | -0.5743427 | -0.3490124 |
| 6 | -3.8715243 | -2.6957122 | -2.0569430 |
| 1 | -3.5451598 | -4.4902922 | -0.9924537 |
| 6 | -1.4129032 | -1.8812234 | -3.3478575 |
| 6 | -6.8246968 | 0.8489485  | -1.5771412 |
| 6 | -6.0442505 | -3.0185284 | -3.9556994 |
| 6 | -7.4117664 | -0.4887417 | -4.0644447 |
| 1 | -1.6019143 | -0.8524673 | -5.1565197 |
| 7 | 0.5728601  | -1.6344803 | -1.8629058 |
| 6 | 2.8512302  | -0.3873044 | -2.4167701 |
| 8 | 4.8407236  | -1.4003029 | -3.1573320 |
| 8 | 2.7066013  | 2.0490399  | -1.7173419 |
| 6 | 4.8821853  | 3.7097073  | -1.5080855 |
| 6 | 6.7816695  | 2.7502717  | 0.4477958  |
| 1 | 7.7646378  | 1.0338734  | -0.1809303 |
| 1 | 5.8603456  | 2.3214853  | 2.2703076  |
| 1 | 8.2278619  | 4.1936555  | 0.8068968  |
| 6 | 3.6890759  | 6.1830494  | -0.5666595 |
| 1 | 5.1491518  | 7.6338374  | -0.3077784 |
| 1 | 2.7272190  | 5.9275188  | 1.2551082  |
| 1 | 2.2961912  | 6.9285712  | -1.9121932 |
| 6 | 6.1531096  | 4.1567667  | -4.0656920 |
| 1 | 7.5501611  | 5.6834157  | -3.9099914 |
| 1 | 7.1552157  | 2.4746846  | -4.7597061 |
| 6 | -0.7176045 | -5.3128351 | -5.4715162 |
| 1 | -0.1166224 | -6.3981950 | -3.8207098 |
| 7 | 0.9541454  | -4.9505504 | -7.4329427 |

|   |            |            |            |
|---|------------|------------|------------|
| 8 | 3.3408267  | -5.2547825 | -7.1080906 |
| 8 | 0.3454564  | -4.2594625 | -9.5594106 |
| 3 | 5.9407614  | -4.0802273 | -5.2151054 |
| 1 | -2.7086514 | -5.5857546 | -5.9617238 |
| 1 | 4.7779883  | 4.7165578  | -5.5154158 |
| 1 | -8.5095833 | 0.9631445  | -0.3368960 |
| 1 | -6.1745937 | 2.8149837  | -1.8691999 |
| 1 | -6.7556981 | 0.6434288  | -5.6961834 |
| 1 | -9.4667240 | -0.7336625 | -4.3433939 |
| 1 | -5.3433820 | -3.6286445 | -5.8369701 |
| 1 | -7.3351277 | -4.5396359 | -3.3264089 |
| 6 | -4.8470482 | -0.8975868 | 2.3252117  |
| 8 | -6.1330401 | 0.4038426  | 3.7323409  |
| 8 | -3.3108296 | -2.7736285 | 3.2196257  |
| 6 | -2.8596431 | -2.9156557 | 5.8645199  |
| 1 | -2.0956680 | -4.8544597 | 6.0082753  |
| 1 | -4.6492025 | -2.8204740 | 6.9446524  |
| 6 | -0.9669166 | -1.0206211 | 6.8013655  |
| 6 | 2.5584410  | 2.4414734  | 8.6336920  |
| 6 | 1.2182749  | -0.4986257 | 5.4221716  |
| 6 | -1.3784349 | 0.1981969  | 9.1035493  |
| 6 | 0.3874754  | 1.9147442  | 10.0190778 |
| 6 | 2.9643964  | 1.2402171  | 6.3325033  |
| 1 | 1.5419039  | -1.4397907 | 3.6029982  |
| 1 | -3.1040509 | -0.1828149 | 10.1844663 |
| 1 | 0.0588968  | 2.8637233  | 11.8277922 |
| 1 | 4.6586329  | 1.6710461  | 5.2067034  |
| 1 | 3.9392451  | 3.8046189  | 9.3503709  |

**(S) -26**

SPARTAN 'O2 Fast HF Program: (PC/x86c)  
 Run type: Geometry optimization  
 (Analytical Gradient)  
 (MM/Amide correction used)  
 Model: RHF/PM3  
 Number of shells: 73  
 49 S shells  
 24 P shells  
 Number of basis functions: 121  
 Number of electrons: 130  
 Use of molecular symmetry disabled  
 Molecular charge: 1  
 Spin multiplicity: 1  
 Point Group = C1 Order = 1 Nsymop = 1  
 This system has 141 degrees of freedom  
 Initial Hessian option  
 Hessian from MMFF94 calculation used.  
 Found 1 amide linkage(s)

Heat of Formation: 11.980 kcal/mol

49 121 73 219 1 1 121 0 RHF PM3 OPT  
 C1

## GEOMETRY

|   |            |            |            |
|---|------------|------------|------------|
| 6 | 5.5515862  | 1.4159845  | -1.4042096 |
| 1 | 6.0979792  | 2.7069567  | 0.1919678  |
| 6 | 3.3945360  | 2.6851194  | -2.7678812 |
| 6 | 6.7555549  | -3.0521293 | -1.1764062 |
| 6 | 7.8311797  | 0.9777964  | -3.1521896 |
| 6 | 8.1820522  | -1.8752352 | -3.3824310 |
| 1 | 3.7800461  | 3.4731937  | -4.6726522 |
| 7 | 1.1478962  | 2.9230433  | -1.7481828 |
| 6 | -0.9905750 | 4.2324404  | -3.0766762 |
| 8 | -0.7084666 | 5.1817650  | -5.1317878 |
| 8 | -2.9854108 | 4.0660409  | -1.5507327 |
| 6 | -5.4612669 | 5.1526195  | -2.2497642 |
| 6 | -5.2718630 | 8.0101103  | -2.5594279 |
| 1 | -4.2086847 | 8.5585515  | -4.2558881 |
| 1 | -4.3758104 | 8.9125321  | -0.9191370 |
| 1 | -7.1752544 | 8.8200186  | -2.7449335 |
| 6 | -7.0601963 | 4.4748978  | 0.0620953  |
| 1 | -9.0100678 | 5.1321013  | -0.2188732 |
| 1 | -6.3456449 | 5.3689609  | 1.7948671  |
| 1 | -7.1361663 | 2.4258579  | 0.3906150  |
| 6 | -6.4981044 | 3.8862367  | -4.6209061 |
| 1 | -5.4339198 | 4.4016979  | -6.3272977 |
| 1 | -8.4645638 | 4.4787463  | -4.9284423 |
| 1 | -6.4963960 | 1.8173773  | -4.4611106 |
| 1 | 0.8559781  | 2.1945529  | 0.0358967  |
| 1 | 8.0297292  | -3.5035224 | 0.4253033  |

|   |            |             |            |
|---|------------|-------------|------------|
| 1 | 5.7729530  | -4.8243229  | -1.6928399 |
| 1 | 7.4516842  | -2.5765358  | -5.2138474 |
| 1 | 10.2039658 | -2.4057456  | -3.3526800 |
| 6 | 3.5455224  | -1.2610100  | 1.9484334  |
| 8 | 4.0593096  | -3.3332249  | 3.3155156  |
| 8 | 2.0432747  | 0.4065491   | 2.5817245  |
| 6 | 2.6450583  | -3.8323820  | 5.5809365  |
| 1 | 2.4521753  | -2.1060322  | 6.7447819  |
| 1 | 3.9700045  | -5.1448878  | 6.5227446  |
| 1 | 7.5744838  | 1.8718556   | -5.0273508 |
| 1 | 9.5357439  | 1.8804221   | -2.3394175 |
| 7 | 4.7944510  | -1.1493669  | -0.4494298 |
| 6 | 0.1515339  | -5.0481311  | 5.0327673  |
| 6 | -4.4926771 | -7.3632488  | 4.1488619  |
| 6 | -2.0882492 | -3.7372580  | 5.5005600  |
| 6 | 0.0589467  | -7.5257249  | 4.1313492  |
| 6 | -2.2608600 | -8.6744704  | 3.6841416  |
| 6 | -4.4038808 | -4.8985083  | 5.0600827  |
| 1 | -2.0229996 | -1.7986922  | 6.2306026  |
| 1 | 1.8155879  | -8.5706793  | 3.7949041  |
| 1 | -2.3301817 | -10.6216583 | 2.9832840  |
| 1 | -6.1603060 | -3.8744588  | 5.4504660  |
| 1 | -6.3196875 | -8.2782031  | 3.8125943  |

**Re- (S,R) -21-TS**

SPARTAN 'O2 Fast HF Program: (PC/x86c)  
 Run type: Single point energy  
 Model: RHF/3-21G(\*)  
 Number of shells: 161  
   93 S shells  
   67 SP shells  
   1 6D shells  
 Number of basis functions: 367  
 Number of electrons: 252  
 Number of heavy atoms: 33  
 Number of hydrogens: 30  
 Use of molecular symmetry disabled  
 Molecular charge: 0  
 Spin multiplicity: 1  
 Memory model: direct 38.9 Mb  
 Point Group = C1 Order = 1 Nsymop = 1  
 This system has 183 degrees of freedom

E(HF) = -1871.7155125 a.u.

63 367 161 292 0 1 367 0 RHF 3-21G(\*) NOOPT

C1

GEOMETRY

|    |            |            |             |
|----|------------|------------|-------------|
| 7  | -4.4963700 | -1.2266624 | 0.8205640   |
| 6  | -3.9216203 | -1.2935554 | -1.9631899  |
| 6  | -6.8891015 | 0.2185845  | 1.2775807   |
| 6  | -6.1605880 | 0.0244263  | -3.2584799  |
| 6  | -7.4955963 | 1.5374927  | -1.2052488  |
| 6  | 3.2074423  | -0.6358420 | -2.2198874  |
| 8  | 3.7082643  | -0.1573981 | -4.4172019  |
| 8  | 4.8404240  | -1.2537098 | -0.3516717  |
| 6  | 7.5581003  | -1.0324829 | -0.6854097  |
| 6  | 8.5411836  | -2.9011952 | -2.6569533  |
| 1  | 7.9659367  | -2.3857005 | -4.5834222  |
| 1  | 7.8685974  | -4.8287001 | -2.2893751  |
| 1  | 10.6150331 | -2.9451083 | -2.6227648  |
| 6  | 8.5633225  | -1.7502778 | 1.9399615   |
| 1  | 10.6366856 | -1.6751965 | 1.9565258   |
| 1  | 8.0020852  | -3.6729845 | 2.4846430   |
| 1  | 7.8776952  | -0.4539636 | 3.4091451   |
| 6  | 8.3395901  | 1.6724736  | -1.3297212  |
| 1  | 7.7742865  | 2.2156173  | -3.2509663  |
| 1  | 10.4017349 | 1.8653182  | -1.2153171  |
| 1  | 7.5068492  | 3.0461810  | -0.0155236  |
| 6  | -1.4101778 | -0.1019959 | -2.6294746  |
| 1  | -1.0959514 | 0.1659752  | -4.6786007  |
| 7  | 0.7050532  | -0.6759262 | -1.1847490  |
| 16 | -1.6242644 | 4.9053337  | -2.2442257  |
| 6  | -1.2407099 | 5.6322621  | -5.5050323  |
| 6  | -0.6847271 | 6.6313299  | -10.6661757 |
| 6  | -3.1278409 | 4.9454774  | -7.2184183  |

|   |            |            |             |
|---|------------|------------|-------------|
| 6 | 0.9332953  | 6.8161799  | -6.4118825  |
| 6 | 1.2112089  | 7.3108958  | -8.9791262  |
| 6 | -2.8593777 | 5.4462012  | -9.7807948  |
| 1 | -4.8457986 | 3.9956568  | -6.5163470  |
| 1 | 2.4339403  | 7.3620173  | -5.0847823  |
| 1 | 2.9269614  | 8.2391672  | -9.6682582  |
| 1 | -4.3595683 | 4.9125374  | -11.1013469 |
| 1 | -0.4682904 | 7.0258381  | -12.6861619 |
| 8 | 0.6130442  | 5.7935239  | -0.7358305  |
| 8 | -4.1858705 | 5.8286015  | -1.3426644  |
| 1 | 0.4618574  | -1.2964415 | 0.5809021   |
| 1 | -8.4482685 | -1.0389644 | 1.8908001   |
| 1 | -6.5424201 | 1.5684200  | 2.8363063   |
| 1 | -5.5514892 | 1.2668350  | -4.8417387  |
| 1 | -7.4352858 | -1.3924408 | -4.1190043  |
| 1 | -6.7518249 | 3.5398307  | -1.1817888  |
| 1 | -9.5496490 | 1.6723654  | -1.5354387  |
| 6 | -3.9829210 | -3.4535685 | 2.2515425   |
| 8 | -2.4620533 | -5.0797996 | 1.6230369   |
| 8 | -5.2803918 | -3.5346741 | 4.4725683   |
| 6 | -4.6171935 | -5.3968644 | 6.3062219   |
| 1 | -6.4219663 | -5.5597851 | 7.3452072   |
| 1 | -4.1835428 | -7.2462254 | 5.4303491   |
| 6 | -2.5136865 | -4.5133527 | 7.9909111   |
| 6 | 1.3688456  | -2.9066475 | 11.1642527  |
| 6 | -3.0229730 | -2.8363617 | 9.9616169   |
| 6 | -0.0540704 | -5.3836402 | 7.6146686   |
| 6 | 1.8801951  | -4.5791946 | 9.2018776   |
| 6 | -1.0830149 | -2.0359595 | 11.5422895  |
| 1 | -4.9537632 | -2.1458929 | 10.2583166  |
| 1 | 0.3516641  | -6.6916292 | 6.0592006   |
| 1 | 3.8101345  | -5.2633954 | 8.9004433   |
| 1 | -1.4877514 | -0.7158676 | 13.0836276  |
| 1 | 2.8950929  | -2.2729979 | 12.4090658  |
| 1 | -3.7904100 | -3.3041394 | -2.6346510  |



*Si*-(S,S)-21-TS

SPARTAN 'O2 Fast HF Program: (PC/x86c)  
 Run type: Single point energy  
 Model: RHF/3-21G(\*)  
 Number of shells: 161  
   93 S shells  
   67 SP shells  
   1 6D shells  
 Number of basis functions: 367  
 Number of electrons: 252  
 Number of heavy atoms: 33  
 Number of hydrogens: 30  
 Use of molecular symmetry disabled  
 Molecular charge: 0  
 Spin multiplicity: 1  
 Memory model: direct 38.9 Mb  
 Point Group = C1 Order = 1 Nsymop = 1  
 This system has 183 degrees of freedom

E(HF) = -1871.7203986 a.u.

|          | 63         | 367 | 161 | 292 | 0 | 1          | 367 | 0 | RHF | 3-21G(*)   | NOOPT |
|----------|------------|-----|-----|-----|---|------------|-----|---|-----|------------|-------|
| C1       |            |     |     |     |   |            |     |   |     |            |       |
| GEOMETRY |            |     |     |     |   |            |     |   |     |            |       |
| 7        | -0.8756945 |     |     |     |   | 4.9768729  |     |   |     | 2.0249943  |       |
| 6        | -0.4457392 |     |     |     |   | 3.3578957  |     |   |     | 4.3391458  |       |
| 1        | 1.5879649  |     |     |     |   | 3.4215756  |     |   |     | 4.9311899  |       |
| 6        | -2.9185774 |     |     |     |   | 6.8654204  |     |   |     | 2.5171833  |       |
| 6        | -2.1434189 |     |     |     |   | 4.5026062  |     |   |     | 6.3948922  |       |
| 6        | -0.9656067 |     |     |     |   | -2.1802352 |     |   |     | 0.0610069  |       |
| 8        | -3.1278330 |     |     |     |   | -2.9698941 |     |   |     | 0.1731356  |       |
| 8        | 0.7392577  |     |     |     |   | -2.6783696 |     |   |     | -1.7890814 |       |
| 6        | 0.1427287  |     |     |     |   | -4.3040268 |     |   |     | -3.9141488 |       |
| 6        | 2.6209663  |     |     |     |   | -4.2962915 |     |   |     | -5.4271649 |       |
| 1        | 4.2315518  |     |     |     |   | -4.9339072 |     |   |     | -4.2853550 |       |
| 1        | 3.0739560  |     |     |     |   | -2.3937917 |     |   |     | -6.1545451 |       |
| 1        | 2.4682436  |     |     |     |   | -5.5654312 |     |   |     | -7.0610435 |       |
| 6        | -1.9795042 |     |     |     |   | -3.2074923 |     |   |     | -5.5404880 |       |
| 1        | -2.2069730 |     |     |     |   | -4.3346452 |     |   |     | -7.2675297 |       |
| 1        | -1.5645898 |     |     |     |   | -1.2539737 |     |   |     | -6.1179939 |       |
| 1        | -3.8063598 |     |     |     |   | -3.2074587 |     |   |     | -4.5570846 |       |
| 6        | -0.4781733 |     |     |     |   | -6.9961826 |     |   |     | -3.0684152 |       |
| 1        | 0.9654133  |     |     |     |   | -7.7453498 |     |   |     | -1.7802991 |       |
| 1        | -0.5685841 |     |     |     |   | -8.2602502 |     |   |     | -4.7113517 |       |
| 1        | -2.3107576 |     |     |     |   | -7.1097996 |     |   |     | -2.1011763 |       |
| 6        | -1.1867913 |     |     |     |   | 0.6628564  |     |   |     | 3.7510705  |       |
| 7        | 0.2595716  |     |     |     |   | -0.6724020 |     |   |     | 1.9469680  |       |
| 1        | 1.8993698  |     |     |     |   | 0.1291876  |     |   |     | 1.4553480  |       |
| 16       | -0.1760641 |     |     |     |   | -1.7675637 |     |   |     | 8.0334703  |       |
| 8        | -2.5698834 |     |     |     |   | -1.6354359 |     |   |     | 9.4751260  |       |
| 8        | 2.0695071  |     |     |     |   | -0.5137197 |     |   |     | 9.1303790  |       |

|   |            |             |             |
|---|------------|-------------|-------------|
| 1 | -3.2283962 | 0.2352818   | 3.7891735   |
| 6 | 0.4954384  | -4.8622437  | 7.0075340   |
| 6 | 1.5401854  | -9.7470790  | 5.2735541   |
| 6 | 2.9860050  | -5.6325699  | 6.5807533   |
| 6 | -1.4636164 | -6.5769083  | 6.5602403   |
| 6 | -0.9446704 | -9.0028794  | 5.6980652   |
| 6 | 3.5049190  | -8.0583844  | 5.7200348   |
| 1 | 4.5477119  | -4.3141760  | 6.9486815   |
| 1 | -3.4298778 | -6.0057596  | 6.9053606   |
| 1 | -2.4981346 | -10.3271540 | 5.3555626   |
| 1 | 5.4652136  | -8.6400518  | 5.4004592   |
| 1 | 1.9495007  | -11.6590197 | 4.5949894   |
| 1 | -4.2821944 | 6.7758792   | 0.9349029   |
| 6 | 1.2446471  | 5.6464385   | 0.5154067   |
| 8 | 3.2810832  | 4.5517399   | 0.5515753   |
| 8 | 0.7318403  | 7.5807517   | -1.1133014  |
| 6 | 2.3712318  | 7.9741364   | -3.2162851  |
| 1 | 2.0164534  | 9.9953833   | -3.6020637  |
| 1 | 4.3865337  | 7.7356623   | -2.7095066  |
| 6 | 1.6524885  | 6.3271000   | -5.4131614  |
| 6 | 0.2780182  | 3.2537922   | -9.4648346  |
| 6 | -0.0166724 | 7.2219477   | -7.2470164  |
| 6 | 2.6469361  | 3.8946575   | -5.6273289  |
| 6 | 1.9424227  | 2.3581049   | -7.6385481  |
| 6 | -0.6917469 | 5.6895556   | -9.2726039  |
| 1 | -0.8012683 | 9.1325054   | -7.0893884  |
| 1 | 3.9719405  | 3.1887674   | -4.1959665  |
| 1 | 2.6916200  | 0.4200797   | -7.7561933  |
| 1 | -1.9968000 | 6.4002311   | -10.7124081 |
| 1 | -0.2696981 | 2.0421220   | -11.0499509 |
| 1 | -3.0498989 | 3.0318993   | 7.5762560   |
| 6 | -4.0969344 | 6.1288788   | 5.0406966   |
| 1 | -5.8773592 | 5.0683450   | 4.7537332   |
| 1 | -4.6190785 | 7.8087560   | 6.1659857   |
| 1 | -2.1717806 | 8.8218834   | 2.5599118   |
| 1 | -1.0000429 | 5.6521329   | 7.7174478   |
